# Supplementary material
Source: Elsevier journal article supplement (http://library.osu.edu/projects/msa/suppmat/v264.i1.pp55-60/mmc1.pdf)
Supplement: mmc1 [file mmc1.pdf]

## Supplemental material

**Table I.**

**Some of the calculated *ab initio* potential energies v.s. internuclear separations of the BO( $X^2\Sigma^+$ ).**

| <i>R</i> / bohr | <i>E</i> / hartree | <i>R</i> / bohr | <i>E</i> / hartree | <i>R</i> / bohr | <i>E</i> / hartree | <i>R</i> / bohr | <i>E</i> / hartree |
|-----------------|--------------------|-----------------|--------------------|-----------------|--------------------|-----------------|--------------------|
| 1.71399         | -99.61384          | 3.13129         | -99.76974          | 4.54858         | -99.60652          | 9.83982         | -99.59046          |
| 1.80848         | -99.72553          | 3.22577         | -99.75280          | 4.64307         | -99.60055          | 10.21776        | -99.59046          |
| 1.90297         | -99.80184          | 3.32026         | -99.73677          | 4.73756         | -99.59495          | 10.59571        | -99.59046          |
| 1.99742         | -99.85164          | 3.41475         | -99.72176          | 5.30447         | -99.59459          | 10.97365        | -99.59046          |
| 2.09194         | -99.88161          | 3.50923         | -99.70780          | 5.68242         | -99.59203          | 11.35160        | -99.59045          |
| 2.18642         | -99.89685          | 3.60372         | -99.69484          | 6.06036         | -99.59092          | 11.72955        | -99.59045          |
| 2.28091         | -99.90123          | 3.69821         | -99.68283          | 6.43831         | -99.59074          | 12.10749        | -99.59045          |
| 2.37540         | -99.89769          | 3.79269         | -99.67168          | 6.81626         | -99.59065          | 12.48544        | -99.59045          |
| 2.46988         | -99.88850          | 3.88718         | -99.66134          | 7.19420         | -99.59059          | 12.86338        | -99.59044          |
| 2.56437         | -99.87538          | 3.98167         | -99.65176          | 7.57215         | -99.59055          | 13.24133        | -99.59044          |
| 2.65886         | -99.85964          | 4.07615         | -99.64287          | 7.95009         | -99.59052          | 13.61927        | -99.59044          |
| 2.75334         | -99.84230          | 4.17064         | -99.63460          | 8.32804         | -99.59050          | 13.99722        | -99.59044          |
| 2.84783         | -99.82412          | 4.26512         | -99.62688          | 8.70598         | -99.59049          | 14.37516        | -99.59044          |
| 2.94232         | -99.80569          | 4.35961         | -99.61966          | 9.08393         | -99.59048          |                 |                    |
| 3.03680         | -99.78746          | 4.45410         | -99.61289          | 9.46187         | -99.59047          |                 |                    |

**Table II.****Some of the calculated *ab initio* potential energies v.s. internuclear separations of the BO(A<sup>2</sup>Π).**

| <i>R</i> / bohr | <i>E</i> / hartree | <i>R</i> / bohr | <i>E</i> / hartree | <i>R</i> / bohr | <i>E</i> / hartree | <i>R</i> / bohr | <i>E</i> / hartree |
|-----------------|--------------------|-----------------|--------------------|-----------------|--------------------|-----------------|--------------------|
| 1.83304         | -99.52436          | 4.57314         | -99.64256          | 7.31324         | -99.59236          | 10.05335        | -99.59101          |
| 1.92752         | -99.61494          | 4.66763         | -99.63741          | 7.40773         | -99.59221          | 10.14783        | -99.59100          |
| 2.02201         | -99.67970          | 4.76211         | -99.63263          | 7.50222         | -99.59207          | 10.24232        | -99.59099          |
| 2.11649         | -99.72497          | 4.85660         | -99.62821          | 7.59670         | -99.59195          | 10.33681        | -99.59099          |
| 2.21098         | -99.75558          | 4.95108         | -99.62415          | 7.69119         | -99.59185          | 10.43129        | -99.59098          |
| 2.30547         | -99.77521          | 5.04557         | -99.62044          | 7.78568         | -99.59175          | 10.52578        | -99.59098          |
| 2.39995         | -99.78664          | 5.14006         | -99.61706          | 7.88016         | -99.59166          | 10.62027        | -99.59097          |
| 2.49444         | -99.79200          | 5.23454         | -99.61401          | 7.97465         | -99.59159          | 10.71475        | -99.59097          |
| 2.58893         | -99.79290          | 5.32903         | -99.61126          | 8.06913         | -99.59152          | 10.80924        | -99.59096          |
| 2.68341         | -99.79055          | 5.42352         | -99.60881          | 8.16362         | -99.59146          | 10.90372        | -99.59096          |
| 2.77790         | -99.78590          | 5.51800         | -99.60664          | 8.25811         | -99.59141          | 10.99821        | -99.59095          |
| 2.87239         | -99.77963          | 5.61249         | -99.60471          | 8.35259         | -99.59137          | 11.09270        | -99.59095          |
| 2.96687         | -99.77225          | 5.70698         | -99.60301          | 8.44708         | -99.59132          | 11.18718        | -99.59095          |
| 3.06136         | -99.76417          | 5.80146         | -99.60152          | 8.54157         | -99.59129          | 11.28167        | -99.59094          |
| 3.15584         | -99.75566          | 5.89595         | -99.60021          | 8.63605         | -99.59125          | 11.37616        | -99.59094          |
| 3.25033         | -99.74694          | 5.99043         | -99.59907          | 8.73054         | -99.59122          | 11.47064        | -99.59094          |
| 3.34482         | -99.73815          | 6.08492         | -99.59807          | 8.82502         | -99.59120          | 11.56513        | -99.59094          |
| 3.43930         | -99.72940          | 6.17941         | -99.59720          | 8.91951         | -99.59117          | 11.65962        | -99.59093          |
| 3.53379         | -99.72077          | 6.27389         | -99.59644          | 9.01400         | -99.59115          | 11.75410        | -99.59093          |
| 3.62828         | -99.71231          | 6.36838         | -99.59578          | 9.10848         | -99.59113          | 11.84859        | -99.59093          |
| 3.72276         | -99.70406          | 6.46287         | -99.59520          | 9.20297         | -99.59111          | 11.94307        | -99.59093          |
| 3.81725         | -99.69605          | 6.55735         | -99.59469          | 9.29746         | -99.59109          | 12.03756        | -99.59093          |
| 3.91174         | -99.68830          | 6.65184         | -99.59425          | 9.39194         | -99.59108          | 12.13205        | -99.59092          |
| 4.00622         | -99.68083          | 6.74633         | -99.59386          | 9.48643         | -99.59107          | 12.22653        | -99.59092          |
| 4.10071         | -99.67364          | 6.84081         | -99.59353          | 9.58092         | -99.59105          | 12.32102        | -99.59092          |
| 4.19519         | -99.66675          | 6.93530         | -99.59323          | 9.67540         | -99.59104          | 12.41551        | -99.59092          |
| 4.28968         | -99.66018          | 7.02978         | -99.59297          | 9.76989         | -99.59103          | 12.50376        | -99.59092          |
| 4.38417         | -99.65395          | 7.12427         | -99.59274          | 9.86437         | -99.59102          |                 |                    |
| 4.47865         | -99.64807          | 7.21876         | -99.59254          | 9.95886         | -99.59101          |                 |                    |

Table III.

Vibrational levels  $G_v$ , inertial rotation constant  $B_v$  and centrifugal distortion constant  $D_v$  of  $^{11}\text{B}^{16}\text{O}(\text{X}^2\Sigma^+)$  and  $^{10}\text{B}^{16}\text{O}(\text{X}^2\Sigma^+)$  isotopologues.

| $v$ | $^{11}\text{B}^{16}\text{O}$ |                      |                           | $^{10}\text{B}^{16}\text{O}$ |                      |                           |
|-----|------------------------------|----------------------|---------------------------|------------------------------|----------------------|---------------------------|
|     | $G_v/\text{cm}^{-1}$         | $B_v/\text{cm}^{-1}$ | $10^6 D_v/\text{cm}^{-1}$ | $G_v/\text{cm}^{-1}$         | $B_v/\text{cm}^{-1}$ | $10^6 D_v/\text{cm}^{-1}$ |
| 0   | 942.71                       | 1.76016              | 6.09260                   | 969.73                       | 1.86346              | 6.82131                   |
| 1   | 2809.47                      | 1.73381              | 5.26753                   | 2889.50                      | 1.83500              | 5.92491                   |
| 2   | 4651.36                      | 1.71086              | 5.90394                   | 4783.05                      | 1.81044              | 6.65922                   |
| 3   | 6468.43                      | 1.69833              | 6.76106                   | 6650.43                      | 1.79728              | 7.64232                   |
| 4   | 8260.71                      | 1.68993              | 7.31921                   | 8491.65                      | 1.78823              | 8.23242                   |
| 5   | 10028.24                     | 1.68065              | 7.28482                   | 10306.74                     | 1.77771              | 8.11908                   |
| 6   | 11771.05                     | 1.66761              | 6.78188                   | 12095.75                     | 1.76287              | 7.51620                   |
| 7   | 13489.17                     | 1.65115              | 6.28128                   | 13858.69                     | 1.74451              | 6.97427                   |
| 8   | 15182.64                     | 1.63328              | 6.04450                   | 15595.60                     | 1.72490              | 6.75035                   |
| 9   | 16851.51                     | 1.61528              | 6.00492                   | 17306.52                     | 1.70532              | 6.74066                   |
| 10  | 18495.79                     | 1.59758              | 6.08014                   | 18991.46                     | 1.68610              | 6.84103                   |
| 11  | 20115.53                     | 1.58024              | 6.19192                   | 20650.47                     | 1.66725              | 6.95970                   |
| 12  | 21710.77                     | 1.56305              | 6.21885                   | 22283.57                     | 1.64863              | 6.97758                   |
| 13  | 23281.53                     | 1.54605              | 6.18613                   | 23890.79                     | 1.63031              | 6.93765                   |
| 14  | 24827.86                     | 1.52965              | 6.23465                   | 25472.17                     | 1.61260              | 7.01872                   |
| 15  | 26349.79                     | 1.51370              | 6.37458                   | 27027.74                     | 1.59512              | 7.22404                   |
| 16  | 27847.35                     | 1.49728              | 6.51468                   | 28557.52                     | 1.57687              | 7.38347                   |
| 17  | 29320.59                     | 1.47996              | 6.59100                   | 30061.55                     | 1.55769              | 7.40816                   |
| 18  | 30769.53                     | 1.46222              | 6.58804                   | 31539.85                     | 1.53839              | 7.35731                   |
| 19  | 32194.21                     | 1.44474              | 6.56448                   | 32992.47                     | 1.51954              | 7.35368                   |
| 20  | 33594.67                     | 1.42761              | 6.59173                   | 34419.42                     | 1.50088              | 7.42867                   |
| 21  | 34970.94                     | 1.41040              | 6.65011                   | 35820.75                     | 1.48195              | 7.49467                   |
| 22  | 36323.06                     | 1.39286              | 6.68169                   | 37196.48                     | 1.46268              | 7.51070                   |
| 23  | 37651.06                     | 1.37509              | 6.68725                   | 38546.64                     | 1.44323              | 7.51151                   |
| 24  | 38954.98                     | 1.35723              | 6.69993                   | 39871.26                     | 1.42370              | 7.53954                   |
| 25  | 40234.85                     | 1.33927              | 6.73421                   | 41170.38                     | 1.40404              | 7.58404                   |
| 26  | 41490.72                     | 1.32124              | 6.78195                   | 42444.02                     | 1.38429              | 7.64649                   |
| 27  | 42722.60                     | 1.30308              | 6.83012                   | 43692.21                     | 1.36442              | 7.69666                   |
| 28  | 43930.55                     | 1.28484              | 6.87791                   | 44915.00                     | 1.34446              | 7.75736                   |
| 29  | 45114.60                     | 1.26650              | 6.91876                   | 46112.40                     | 1.32440              | 7.80343                   |
| 30  | 46274.77                     | 1.24810              | 6.96895                   | 47284.44                     | 1.30425              | 7.86163                   |
| 31  | 47411.11                     | 1.22958              | 7.00831                   | 48431.17                     | 1.28402              | 7.91390                   |
| 32  | 48523.66                     | 1.21101              | 7.06221                   | 49552.61                     | 1.26369              | 7.96584                   |
| 33  | 49612.44                     | 1.19236              | 7.10218                   | 50648.79                     | 1.24331              | 8.03157                   |
| 34  | 50677.49                     | 1.17365              | 7.16083                   | 51719.73                     | 1.22283              | 8.08962                   |
| 35  | 51718.86                     | 1.15488              | 7.21667                   | 52765.49                     | 1.20229              | 8.17543                   |
| 36  | 52736.56                     | 1.13602              | 7.28383                   | 53786.07                     | 1.18163              | 8.26492                   |
| 37  | 53730.65                     | 1.11709              | 7.36623                   | 54781.52                     | 1.16083              | 8.37548                   |

|    |          |         |         |          |         |         |
|----|----------|---------|---------|----------|---------|---------|
| 38 | 54701.15 | 1.09800 | 7.45581 | 55751.86 | 1.13984 | 8.51420 |
| 39 | 55648.10 | 1.07876 | 7.57135 | 56697.13 | 1.11853 | 8.86821 |
| 40 | 57124.05 | 1.06417 | 8.11144 | 57156.03 | 1.06317 | 8.24472 |
| 41 | 58017.73 | 1.04206 | 8.31597 | 58043.58 | 1.04107 | 8.44427 |
| 42 | 58882.47 | 1.01945 | 8.54405 | 58902.37 | 1.01850 | 8.66627 |
| 43 | 59717.75 | 0.99629 | 8.79938 | 59731.95 | 0.99541 | 8.91423 |
| 44 | 60523.01 | 0.97253 | 9.08650 | 60531.78 | 0.97174 | 9.19246 |
| 45 | 61297.63 | 0.94810 | 9.41110 | 61301.33 | 0.94744 | 9.50632 |
| 46 | 62040.93 | 0.92292 | 9.78034 | 62039.97 | 0.92242 | 9.86259 |
| 47 | 62752.18 | 0.89690 | 10.2035 | 62747.03 | 0.89661 | 10.2699 |
| 48 | 63430.55 | 0.86994 | 10.6925 | 63421.75 | 0.86990 | 10.7397 |
| 49 | 64075.11 | 0.84189 | 11.2637 | 64063.29 | 0.84216 | 11.2870 |
| 50 | 64684.84 | 0.81259 | 11.9391 | 64670.70 | 0.81325 | 11.9326 |
| 51 | 65258.53 | 0.78183 | 12.7504 | 65242.87 | 0.78295 | 12.7055 |
| 52 | 65794.81 | 0.74933 | 13.7436 | 65778.54 | 0.75101 | 13.6486 |
| 53 | 66292.06 | 0.71473 | 14.9901 | 66276.20 | 0.71710 | 14.8273 |
| 54 | 66748.31 | 0.67749 | 16.6070 | 66734.03 | 0.68071 | 16.3484 |
| 55 | 67161.13 | 0.63685 | 18.8029 | 67149.77 | 0.64115 | 18.3999 |
| 56 | 67527.33 | 0.59156 | 21.9974 | 67520.47 | 0.59727 | 21.3546 |
| 57 | 67842.49 | 0.53933 | 27.2083 | 67842.02 | 0.54700 | 26.0948 |
| 58 | 68099.59 | 0.47488 | 37.9821 | 68107.97 | 0.48571 | 35.5394 |
| 59 | 68283.27 | 0.37165 | 108.460 | 68304.88 | 0.39338 | 84.5749 |

---

Table IV.

Vibrational level  $G_v$ , inertial rotation constant  $B_v$  and centrifugal distortion constant  $D_v$  of the  $^{11}\text{B}^{16}\text{O}(\text{A}^2\Pi)$  and  $^{10}\text{B}^{16}\text{O}(\text{A}^2\Pi)$  isotopologues.

| $v$ | $^{11}\text{B}^{16}\text{O}$ |                      |                           | $^{10}\text{B}^{16}\text{O}$ |                      |                           |
|-----|------------------------------|----------------------|---------------------------|------------------------------|----------------------|---------------------------|
|     | $G_v/\text{cm}^{-1}$         | $B_v/\text{cm}^{-1}$ | $10^6 D_v/\text{cm}^{-1}$ | $G_v/\text{cm}^{-1}$         | $B_v/\text{cm}^{-1}$ | $10^6 D_v/\text{cm}^{-1}$ |
| 0   | 625.69                       | 1.39601              | 6.95654                   | 643.36                       | 1.47802              | 7.80019                   |
| 1   | 1861.80                      | 1.37809              | 6.94380                   | 1914.06                      | 1.45849              | 7.78549                   |
| 2   | 3077.74                      | 1.36028              | 6.93045                   | 3163.57                      | 1.43909              | 7.76975                   |
| 3   | 4273.74                      | 1.34262              | 6.91348                   | 4392.13                      | 1.41986              | 7.75001                   |
| 4   | 5450.02                      | 1.32509              | 6.89375                   | 5599.98                      | 1.40078              | 7.72663                   |
| 5   | 6606.80                      | 1.30773              | 6.87038                   | 6787.34                      | 1.38188              | 7.69939                   |
| 6   | 7744.32                      | 1.29052              | 6.84717                   | 7954.45                      | 1.36317              | 7.67264                   |
| 7   | 8862.79                      | 1.27347              | 6.82240                   | 9101.55                      | 1.34462              | 7.64313                   |
| 8   | 9962.45                      | 1.25659              | 6.79483                   | 10228.86                     | 1.32627              | 7.60975                   |
| 9   | 11043.51                     | 1.23990              | 6.76194                   | 11336.62                     | 1.30813              | 7.57196                   |
| 10  | 12106.20                     | 1.22337              | 6.72636                   | 12425.07                     | 1.29017              | 7.53016                   |
| 11  | 13150.74                     | 1.20703              | 6.69416                   | 13494.42                     | 1.27243              | 7.49215                   |
| 12  | 14177.37                     | 1.19087              | 6.65751                   | 14544.93                     | 1.25489              | 7.44967                   |
| 13  | 15186.30                     | 1.17489              | 6.62006                   | 15576.82                     | 1.23755              | 7.40481                   |
| 14  | 16177.77                     | 1.15909              | 6.57862                   | 16590.32                     | 1.22042              | 7.35754                   |
| 15  | 17151.98                     | 1.14347              | 6.53836                   | 17585.67                     | 1.20348              | 7.31025                   |
| 16  | 18109.18                     | 1.12804              | 6.49720                   | 18563.10                     | 1.18675              | 7.26299                   |
| 17  | 19049.59                     | 1.11278              | 6.45624                   | 19522.84                     | 1.17022              | 7.21519                   |
| 18  | 19973.42                     | 1.09771              | 6.41609                   | 20465.13                     | 1.15390              | 7.17150                   |
| 19  | 20880.91                     | 1.08281              | 6.38006                   | 21390.20                     | 1.13776              | 7.13055                   |
| 20  | 21772.28                     | 1.06807              | 6.34452                   | 22298.29                     | 1.12180              | 7.08893                   |
| 21  | 22647.75                     | 1.05349              | 6.30718                   | 23189.61                     | 1.10601              | 7.04575                   |
| 22  | 23507.56                     | 1.03907              | 6.27132                   | 24064.42                     | 1.09041              | 7.01005                   |
| 23  | 24351.91                     | 1.02480              | 6.24306                   | 24922.94                     | 1.07494              | 6.98056                   |
| 24  | 25181.05                     | 1.01064              | 6.21789                   | 25749.01                     | 1.05959              | 6.95191                   |
| 25  | 25995.19                     | 0.99659              | 6.19281                   | 26578.12                     | 1.04437              | 6.92624                   |
| 26  | 26794.57                     | 0.98265              | 6.17269                   | 27392.65                     | 1.02925              | 6.91177                   |
| 27  | 27579.39                     | 0.96880              | 6.16260                   | 28192.91                     | 1.01421              | 6.90668                   |
| 28  | 28349.90                     | 0.95500              | 6.15909                   | 28979.22                     | 0.99921              | 6.90889                   |
| 29  | 29106.31                     | 0.94124              | 6.16209                   | 29751.91                     | 0.98423              | 6.92179                   |
| 30  | 29848.85                     | 0.92750              | 6.17491                   | 30496.07                     | 0.96924              | 6.94906                   |
| 31  | 30577.74                     | 0.91374              | 6.19967                   | 31232.67                     | 0.95420              | 6.99100                   |
| 32  | 31293.21                     | 0.89994              | 6.23678                   | 31955.08                     | 0.93907              | 7.04801                   |
| 33  | 31995.49                     | 0.88605              | 6.28666                   | 32663.53                     | 0.92381              | 7.11807                   |
| 34  | 32684.80                     | 0.87205              | 6.34729                   | 33358.26                     | 0.90840              | 7.19947                   |
| 35  | 33361.36                     | 0.85790              | 6.41744                   | 34039.50                     | 0.89280              | 7.29451                   |
| 36  | 34025.39                     | 0.84360              | 6.49916                   | 34707.48                     | 0.87700              | 7.40246                   |
| 37  | 34677.13                     | 0.82910              | 6.59168                   | 35362.43                     | 0.86096              | 7.52377                   |

|    |          |         |         |          |         |         |
|----|----------|---------|---------|----------|---------|---------|
| 38 | 35316.80 | 0.81441 | 6.69507 | 36004.59 | 0.84467 | 7.66484 |
| 39 | 35944.63 | 0.79948 | 6.81470 | 36634.19 | 0.82808 | 7.83056 |
| 40 | 36572.55 | 0.78218 | 7.05387 | 37251.60 | 0.80851 | 8.10981 |
| 41 | 37151.18 | 0.76634 | 7.20361 | 37826.04 | 0.79080 | 8.31052 |
| 42 | 37712.72 | 0.75016 | 7.37339 | 38381.92 | 0.77267 | 8.53929 |
| 43 | 38256.81 | 0.73360 | 7.56613 | 38918.80 | 0.75406 | 8.80069 |
| 44 | 38783.04 | 0.71664 | 7.78538 | 39436.19 | 0.73490 | 9.10040 |
| 45 | 39291.00 | 0.69920 | 8.03556 | 39933.57 | 0.71513 | 9.44566 |
| 46 | 39780.20 | 0.68123 | 8.32220 | 40410.33 | 0.69466 | 9.84567 |
| 47 | 40250.11 | 0.66267 | 8.65230 | 40865.81 | 0.67340 | 10.3125 |
| 48 | 40700.16 | 0.64342 | 9.03485 | 41299.28 | 0.65121 | 10.8620 |
| 49 | 41129.69 | 0.62340 | 9.48163 | 41709.91 | 0.62795 | 11.5159 |
| 50 | 41537.97 | 0.60248 | 10.0083 | 42096.72 | 0.60345 | 12.3043 |
| 51 | 41924.16 | 0.58052 | 10.6363 | 42458.65 | 0.57746 | 13.2703 |
| 52 | 42287.34 | 0.55734 | 11.3957 | 42794.40 | 0.54967 | 14.4777 |
| 53 | 42626.40 | 0.53270 | 12.3295 | 43102.48 | 0.51969 | 16.0257 |
| 54 | 42940.09 | 0.50630 | 13.5027 | 43381.10 | 0.48693 | 18.0754 |
| 55 | 43226.91 | 0.47772 | 15.0163 | 43628.05 | 0.45057 | 20.9056 |
| 56 | 43485.06 | 0.44639 | 17.0372 | 43840.62 | 0.40938 | 25.0291 |
| 57 | 43712.34 | 0.41146 | 19.8570 | 44015.36 | 0.36145 | 31.4107 |
| 58 | 43906.01 | 0.37165 | 24.0135 | 44148.23 | 0.30438 | 41.2639 |
| 59 | 44062.67 | 0.32510 | 30.4677 | 44236.87 | 0.24045 | 48.9412 |
| 60 | 44178.62 | 0.26999 | 39.7204 | 44290.03 | 0.19067 | 38.6282 |
| 61 | 44253.53 | 0.21231 | 42.5500 | 44325.87 | 0.15932 | 36.1842 |
| 62 | 44299.53 | 0.17232 | 32.4682 | 44351.37 | 0.12842 | 50.6160 |
| 63 | 44331.96 | 0.14476 | 33.5075 | 44365.99 | 0.08139 | 163.726 |
| 64 | 44354.86 | 0.11522 | 50.3522 |          |         |         |
| 65 | 44367.00 | 0.06480 | 251.398 |          |         |         |

---

Table V.

Ro-vibrational levels (in  $\text{cm}^{-1}$ ) for the  $^{11}\text{B}^{16}\text{O}(X^2\Sigma^+)$  isotopologue.

| $J$ | $v=0$   | $v=1$   | $v=2$   | $v=3$   | $v=4$    | $v=5$    | $v=6$    | $v=7$    | $v=8$    |
|-----|---------|---------|---------|---------|----------|----------|----------|----------|----------|
| 0   | 942.71  | 2809.47 | 4651.36 | 6468.43 | 8260.71  | 10028.24 | 11771.05 | 13489.17 | 15182.64 |
| 1   | 946.22  | 2812.94 | 4654.81 | 6471.85 | 8264.10  | 10031.59 | 11774.37 | 13492.46 | 15185.90 |
| 2   | 953.23  | 2819.90 | 4661.70 | 6478.68 | 8270.86  | 10038.30 | 11781.01 | 13499.04 | 15192.42 |
| 3   | 963.75  | 2830.32 | 4672.03 | 6488.92 | 8281.01  | 10048.35 | 11790.97 | 13508.90 | 15202.19 |
| 4   | 977.77  | 2844.22 | 4685.81 | 6502.58 | 8294.55  | 10061.76 | 11804.25 | 13522.06 | 15215.21 |
| 5   | 995.30  | 2861.60 | 4703.04 | 6519.64 | 8311.46  | 10078.52 | 11820.85 | 13538.50 | 15231.50 |
| 6   | 1016.33 | 2882.45 | 4723.70 | 6540.13 | 8331.75  | 10098.63 | 11840.77 | 13558.23 | 15251.03 |
| 7   | 1040.86 | 2906.77 | 4747.81 | 6564.02 | 8355.43  | 10122.08 | 11864.01 | 13581.24 | 15273.83 |
| 8   | 1068.89 | 2934.56 | 4775.36 | 6591.32 | 8382.48  | 10148.89 | 11890.56 | 13607.54 | 15299.87 |
| 9   | 1100.43 | 2965.82 | 4806.34 | 6622.03 | 8412.92  | 10179.04 | 11920.43 | 13637.13 | 15329.17 |
| 10  | 1135.46 | 3000.55 | 4840.77 | 6656.15 | 8446.73  | 10212.53 | 11953.61 | 13669.99 | 15361.71 |
| 11  | 1174.00 | 3038.75 | 4878.63 | 6693.68 | 8483.91  | 10249.38 | 11990.11 | 13706.14 | 15397.51 |
| 12  | 1216.03 | 3080.42 | 4919.93 | 6734.60 | 8524.47  | 10289.56 | 12029.91 | 13745.56 | 15436.55 |
| 13  | 1261.55 | 3125.55 | 4964.67 | 6778.94 | 8568.40  | 10333.08 | 12073.03 | 13788.27 | 15478.84 |
| 14  | 1310.57 | 3174.14 | 5012.83 | 6826.67 | 8615.70  | 10379.94 | 12119.45 | 13834.25 | 15524.37 |
| 15  | 1363.07 | 3226.19 | 5064.42 | 6877.80 | 8666.36  | 10430.14 | 12169.18 | 13883.50 | 15573.14 |
| 16  | 1419.07 | 3281.70 | 5119.45 | 6932.33 | 8720.40  | 10483.68 | 12222.21 | 13936.02 | 15625.15 |
| 17  | 1478.55 | 3340.67 | 5177.89 | 6990.26 | 8777.79  | 10540.54 | 12278.53 | 13991.81 | 15680.40 |
| 18  | 1541.51 | 3403.09 | 5239.76 | 7051.57 | 8838.55  | 10600.73 | 12338.16 | 14050.87 | 15738.88 |
| 19  | 1607.96 | 3468.96 | 5305.05 | 7116.27 | 8902.66  | 10664.26 | 12401.08 | 14113.19 | 15800.60 |
| 20  | 1677.88 | 3538.27 | 5373.76 | 7184.36 | 8970.13  | 10731.10 | 12467.30 | 14178.77 | 15865.54 |
| 21  | 1751.28 | 3611.04 | 5445.88 | 7255.84 | 9040.95  | 10801.26 | 12536.80 | 14247.60 | 15933.71 |
| 22  | 1828.16 | 3687.24 | 5521.41 | 7330.69 | 9115.13  | 10874.75 | 12609.59 | 14319.70 | 16005.09 |
| 23  | 1908.50 | 3766.88 | 5600.35 | 7408.92 | 9192.64  | 10951.54 | 12685.67 | 14395.04 | 16079.70 |
| 24  | 1992.30 | 3849.96 | 5682.69 | 7490.52 | 9273.50  | 11031.65 | 12765.02 | 14473.63 | 16157.52 |
| 25  | 2079.57 | 3936.47 | 5768.43 | 7575.50 | 9357.70  | 11115.07 | 12847.64 | 14555.46 | 16238.56 |
| 26  | 2170.30 | 4026.41 | 5857.58 | 7663.84 | 9445.23  | 11201.79 | 12933.54 | 14640.54 | 16322.80 |
| 27  | 2264.48 | 4119.77 | 5950.11 | 7755.54 | 9536.09  | 11291.80 | 13022.71 | 14728.85 | 16410.25 |
| 28  | 2362.11 | 4216.55 | 6046.03 | 7850.60 | 9630.28  | 11385.12 | 13115.14 | 14820.39 | 16500.89 |
| 29  | 2463.19 | 4316.75 | 6145.34 | 7949.02 | 9727.80  | 11481.72 | 13210.83 | 14915.16 | 16594.74 |
| 30  | 2567.71 | 4420.36 | 6248.03 | 8050.78 | 9828.63  | 11581.62 | 13309.78 | 15013.15 | 16691.77 |
| 31  | 2675.67 | 4527.37 | 6354.10 | 8155.89 | 9932.78  | 11684.79 | 13411.98 | 15114.36 | 16791.99 |
| 32  | 2787.06 | 4637.79 | 6463.54 | 8264.34 | 10040.23 | 11791.25 | 13517.42 | 15218.79 | 16895.39 |
| 33  | 2901.89 | 4751.61 | 6576.35 | 8376.13 | 10150.99 | 11900.97 | 13626.10 | 15326.42 | 17001.97 |
| 34  | 3020.13 | 4868.82 | 6692.52 | 8491.25 | 10265.05 | 12013.97 | 13738.03 | 15437.26 | 17111.72 |
| 35  | 3141.80 | 4989.42 | 6812.04 | 8609.69 | 10382.41 | 12130.22 | 13853.18 | 15551.30 | 17224.64 |
| 36  | 3266.88 | 5113.41 | 6934.92 | 8731.46 | 10503.05 | 12249.74 | 13971.56 | 15668.54 | 17340.71 |
| 37  | 3395.36 | 5240.77 | 7061.15 | 8856.54 | 10626.98 | 12372.51 | 14093.16 | 15788.96 | 17459.95 |
| 38  | 3527.26 | 5371.50 | 7190.71 | 8984.93 | 10754.19 | 12498.52 | 14217.97 | 15912.56 | 17582.34 |
| 39  | 3662.54 | 5505.60 | 7323.62 | 9116.63 | 10884.67 | 12627.78 | 14345.99 | 16039.34 | 17707.87 |

Table VI.

Ro-vibrational levels (in  $\text{cm}^{-1}$ ) for the  $^{11}\text{B}^{16}\text{O}(\text{A}^2\Pi)$  isotopologue.

| $J$ | $v=0$   | $v=1$   | $v=2$   | $v=3$   | $v=4$   | $v=5$   | $v=6$   | $v=7$    | $v=8$    |
|-----|---------|---------|---------|---------|---------|---------|---------|----------|----------|
| 0   | 625.69  | 1861.80 | 3077.74 | 4273.74 | 5450.02 | 6606.80 | 7744.32 | 8862.79  | 9962.45  |
| 1   | 628.48  | 1864.55 | 3080.46 | 4276.42 | 5452.67 | 6609.42 | 7746.90 | 8865.34  | 9964.96  |
| 2   | 634.05  | 1870.05 | 3085.89 | 4281.79 | 5457.97 | 6614.65 | 7752.07 | 8870.44  | 9969.99  |
| 3   | 642.41  | 1878.31 | 3094.04 | 4289.84 | 5465.91 | 6622.49 | 7759.81 | 8878.08  | 9977.54  |
| 4   | 653.55  | 1889.32 | 3104.91 | 4300.57 | 5476.51 | 6632.95 | 7770.14 | 8888.28  | 9987.60  |
| 5   | 667.48  | 1903.07 | 3118.50 | 4313.98 | 5489.75 | 6646.03 | 7783.04 | 8901.01  | 10000.17 |
| 6   | 684.20  | 1919.58 | 3134.79 | 4330.07 | 5505.64 | 6661.71 | 7798.52 | 8916.30  | 10015.26 |
| 7   | 703.70  | 1938.83 | 3153.81 | 4348.85 | 5524.17 | 6680.01 | 7816.59 | 8934.13  | 10032.86 |
| 8   | 725.97  | 1960.83 | 3175.53 | 4370.30 | 5545.35 | 6700.92 | 7837.23 | 8954.50  | 10052.96 |
| 9   | 751.04  | 1985.58 | 3199.97 | 4394.42 | 5569.17 | 6724.44 | 7860.44 | 8977.42  | 10075.58 |
| 10  | 778.88  | 2013.07 | 3227.12 | 4421.23 | 5595.64 | 6750.56 | 7886.23 | 9002.87  | 10100.71 |
| 11  | 809.49  | 2043.31 | 3256.97 | 4450.71 | 5624.74 | 6779.29 | 7914.60 | 9030.87  | 10128.34 |
| 12  | 842.89  | 2076.28 | 3289.53 | 4482.86 | 5656.48 | 6810.63 | 7945.53 | 9061.41  | 10158.48 |
| 13  | 879.05  | 2112.00 | 3324.80 | 4517.68 | 5690.86 | 6844.57 | 7979.03 | 9094.48  | 10191.12 |
| 14  | 917.99  | 2150.45 | 3362.77 | 4555.17 | 5727.87 | 6881.11 | 8015.10 | 9130.08  | 10226.26 |
| 15  | 959.70  | 2191.64 | 3403.44 | 4595.32 | 5767.52 | 6920.25 | 8053.74 | 9168.21  | 10263.90 |
| 16  | 1004.18 | 2235.56 | 3446.81 | 4638.14 | 5809.79 | 6961.98 | 8094.94 | 9208.88  | 10304.04 |
| 17  | 1051.42 | 2282.21 | 3492.87 | 4683.62 | 5854.69 | 7006.31 | 8138.69 | 9252.07  | 10346.66 |
| 18  | 1101.42 | 2331.58 | 3541.62 | 4731.76 | 5902.22 | 7053.23 | 8185.01 | 9297.78  | 10391.78 |
| 19  | 1154.18 | 2383.68 | 3593.07 | 4782.55 | 5952.37 | 7102.73 | 8233.87 | 9346.02  | 10439.39 |
| 20  | 1209.69 | 2438.50 | 3647.20 | 4836.00 | 6005.13 | 7154.82 | 8285.29 | 9396.77  | 10489.48 |
| 21  | 1267.96 | 2496.04 | 3704.01 | 4892.09 | 6060.51 | 7209.49 | 8339.26 | 9450.04  | 10542.06 |
| 22  | 1328.98 | 2556.29 | 3763.50 | 4950.83 | 6118.50 | 7266.74 | 8395.77 | 9505.82  | 10597.11 |
| 23  | 1392.74 | 2619.26 | 3825.67 | 5012.21 | 6179.10 | 7326.56 | 8454.82 | 9564.10  | 10654.64 |
| 24  | 1459.24 | 2684.93 | 3890.52 | 5076.23 | 6242.30 | 7388.96 | 8516.41 | 9624.89  | 10714.63 |
| 25  | 1528.49 | 2753.30 | 3958.03 | 5142.89 | 6308.11 | 7453.92 | 8580.53 | 9688.18  | 10777.10 |
| 26  | 1600.46 | 2824.37 | 4028.20 | 5212.17 | 6376.51 | 7521.44 | 8647.18 | 9753.97  | 10842.02 |
| 27  | 1675.16 | 2898.14 | 4101.04 | 5284.08 | 6447.50 | 7591.52 | 8716.36 | 9822.25  | 10909.41 |
| 28  | 1752.59 | 2974.59 | 4176.53 | 5358.61 | 6521.08 | 7664.15 | 8788.06 | 9893.01  | 10979.25 |
| 29  | 1832.74 | 3053.73 | 4254.67 | 5435.76 | 6597.24 | 7739.34 | 8862.27 | 9966.26  | 11051.54 |
| 30  | 1915.60 | 3135.56 | 4335.46 | 5515.52 | 6675.99 | 7817.07 | 8938.99 | 10041.99 | 11126.28 |
| 31  | 2001.18 | 3220.06 | 4418.88 | 5597.89 | 6757.30 | 7897.34 | 9018.22 | 10120.19 | 11203.45 |
| 32  | 2089.46 | 3307.22 | 4504.95 | 5682.86 | 6841.18 | 7980.14 | 9099.96 | 10200.86 | 11283.07 |
| 33  | 2180.44 | 3397.06 | 4593.65 | 5770.43 | 6927.63 | 8065.47 | 9184.18 | 10283.99 | 11365.11 |
| 34  | 2274.11 | 3489.55 | 4684.97 | 5860.59 | 7016.64 | 8153.33 | 9270.90 | 10369.58 | 11449.58 |
| 35  | 2370.48 | 3584.70 | 4778.91 | 5953.34 | 7108.19 | 8243.71 | 9360.11 | 10457.62 | 11536.46 |
| 36  | 2469.52 | 3682.50 | 4875.47 | 6048.66 | 7202.30 | 8336.60 | 9451.79 | 10548.11 | 11625.76 |
| 37  | 2571.25 | 3782.94 | 4974.64 | 6146.56 | 7298.94 | 8432.00 | 9545.95 | 10641.04 | 11717.47 |
| 38  | 2675.64 | 3886.02 | 5076.41 | 6247.03 | 7398.12 | 8529.89 | 9642.58 | 10736.40 | 11811.58 |
| 39  | 2782.70 | 3991.73 | 5180.77 | 6350.07 | 7499.83 | 8630.29 | 9741.67 | 10834.19 | 11908.09 |
